# Supplementary material for: A Dual Marker for Monitoring MDR-TB Treatment: Host-Derived miRNAs and M. tuberculosis-Derived RNA Sequences in Serum
Source: PubMed Central journal article supplement (PMC8600136; doi:10.3389/fimmu.2021.760468), 2021-11-04
Supplement: DataSheet_1.pdf [file DataSheet_1.pdf]

## *Supplementary Material*

### 1. The C<sub>T</sub> value of 32 endogenous miRNAs evaluated at T(0) and T(12)

| PLATE 1 | ID         | miRNA                  | C <sub>T</sub> (T0) | C <sub>T</sub> (T12) |
|---------|------------|------------------------|---------------------|----------------------|
| A1      | 477860_mir | <b>hsa-miR-16-5p</b>   | 28.04980659         | 26.50959587          |
| A2      | 478575_mir | <b>hsa-let-7a-5p</b>   | 30.23466873         | 28.90431595          |
| A3      | 478221_mir | <b>hsa-let-7b-3p</b>   | 32.71641159         | 31.45339203          |
| A4      | 478576_mir | <b>hsa-let-7b-5p</b>   | 34.08200455         | 31.86747932          |
| A5      | 478577_mir | <b>hsa-let-7c-5p</b>   | Undetermined        | 32.85919189          |
| A6      | 477848_mir | <b>hsa-let-7d-3p</b>   | Undetermined        | 29.93468475          |
| A7      | 478439_mir | <b>hsa-let-7d-5p</b>   | 32.24302673         | 32.57905197          |
| A8      | 478579_mir | <b>hsa-let-7e-5p</b>   | Undetermined        | 28.68997765          |
| A9      | 478578_mir | <b>hsa-let-7f-5p</b>   | 32.30392075         | 30.90026665          |
| A10     | 478580_mir | <b>hsa-let-7g-5p</b>   | 32.25228882         | 30.12475967          |
| A11     | 477862_mir | <b>hsa-let-7i-3p</b>   | 34.33986282         | 33.7143631           |
| A12     | 478375_mir | <b>hsa-let-7i-5p</b>   | 29.83022499         | 30.43766022          |
| B1      | 477820_mir | <b>hsa-miR-1-3p</b>    | 28.52332115         | 26.75643158          |
| B2      | 477863_mir | <b>hsa-miR-101-3p</b>  | 31.71281242         | 29.34156227          |
| B3      | 478253_mir | <b>hsa-miR-103a-3p</b> | 32.35660553         | 32.65026093          |
| B4      | 478225_mir | <b>hsa-miR-106a-5p</b> | Undetermined        | Undetermined         |
| B5      | 477866_mir | <b>hsa-miR-106b-3p</b> | Undetermined        | 38.74437714          |

## Supplementary Material

|     |            |                        |              |              |
|-----|------------|------------------------|--------------|--------------|
| B6  | 478412_mir | <b>hsa-miR-106b-5p</b> | Undetermined | 29.01012421  |
| B7  | 478254_mir | <b>hsa-miR-107</b>     | 34.0449295   | 33.58921814  |
| B8  | 479241_mir | <b>hsa-miR-10a-5p</b>  | 34.46384048  | 31.45865822  |
| B9  | 478494_mir | <b>hsa-miR-10b-5p</b>  | 32.19300461  | 32.58842087  |
| B10 | 477855_mir | <b>hsa-miR-122-5p</b>  | 32.25159073  | 30.13818359  |
| B11 | 477884_mir | <b>hsa-miR-125a-5p</b> | 30.86580849  | 29.67758179  |
| B12 | 477885_mir | <b>hsa-miR-125b-5p</b> | 28.57684898  | 30.17674828  |
| C1  | 477887_mir | <b>hsa-miR-126-3p</b>  | 27.9211731   | 27.3238678   |
| C2  | 477889_mir | <b>hsa-miR-127-3p</b>  | Undetermined | Undetermined |
| C3  | 477892_mir | <b>hsa-miR-128-3p</b>  | 32.40904617  | 32.24991608  |
| C4  | 477851_mir | <b>hsa-miR-130a-3p</b> | 32.07991791  | 31.8061924   |
| C5  | 477840_mir | <b>hsa-miR-130b-3p</b> | Undetermined | Undetermined |
| C6  | 477900_mir | <b>hsa-miR-132-3p</b>  | Undetermined | 32.49689865  |
| C7  | 478511_mir | <b>hsa-miR-133a-3p</b> | Undetermined | 39.0778656   |
| C8  | 480871_mir | <b>hsa-miR-133b</b>    | Undetermined | 39.36637115  |
| C9  | 478307_mir | <b>hsa-miR-136-5p</b>  | Undetermined | Undetermined |
| C10 | 478312_mir | <b>hsa-miR-139-5p</b>  | 31.50261879  | 30.35593224  |
| C11 | 477908_mir | <b>hsa-miR-140-3p</b>  | 33.10882568  | 33.57636261  |
| C12 | 477909_mir | <b>hsa-miR-140-5p</b>  | Undetermined | 31.84666634  |
| D1  | 478501_mir | <b>hsa-miR-141-3p</b>  | Undetermined | Undetermined |
| D2  | 477910_mir | <b>hsa-miR-142-3p</b>  | 30.31755257  | 28.44344711  |
| D3  | 477911_mir | <b>hsa-miR-142-5p</b>  | Undetermined | 29.97034836  |

|     |            |                        |              |              |
|-----|------------|------------------------|--------------|--------------|
| D4  | 477912_mir | <b>hsa-miR-143-3p</b>  | 31.26897621  | 30.53614235  |
| D5  | 477913_mir | <b>hsa-miR-144-3p</b>  | 26.41192818  | 23.88800621  |
| D6  | 477914_mir | <b>hsa-miR-144-5p</b>  | Undetermined | 31.07780266  |
| D7  | 477916_mir | <b>hsa-miR-145-5p</b>  | Undetermined | 28.73421097  |
| D8  | 478399_mir | <b>hsa-miR-146a-5p</b> | 28.52252769  | 27.58912468  |
| D9  | 478513_mir | <b>hsa-miR-146b-5p</b> | Undetermined | Undetermined |
| D10 | 477814_mir | <b>hsa-miR-148a-3p</b> | 31.11049271  | 32.21821213  |
| D11 | 477824_mir | <b>hsa-miR-148b-3p</b> | 32.5416832   | 31.71259499  |
| D12 | 477918_mir | <b>hsa-miR-150-5p</b>  | 27.15849495  | 27.30678368  |
| E1  | 477919_mir | <b>hsa-miR-151a-3p</b> | 31.65749931  | 33.51758194  |
| E2  | 478505_mir | <b>hsa-miR-151a-5p</b> | 32.98652649  | 31.01762009  |
| E3  | 477921_mir | <b>hsa-miR-152-3p</b>  | Undetermined | 31.51879692  |
| E4  | 477925_mir | <b>hsa-miR-154-5p</b>  | Undetermined | Undetermined |
| E5  | 477927_mir | <b>hsa-miR-155-5p</b>  | 36.60807419  | Undetermined |
| E6  | 477858_mir | <b>hsa-miR-15a-5p</b>  | 29.92562103  | 27.49378204  |
| E7  | 477929_mir | <b>hsa-miR-15b-3p</b>  | Undetermined | Undetermined |
| E8  | 478313_mir | <b>hsa-miR-15b-5p</b>  | 28.71093941  | 27.10866737  |
| E9  | 477931_mir | <b>hsa-miR-16-2-3p</b> | 33.36393738  | 32.87292862  |
| E10 | 478447_mir | <b>hsa-miR-17-5p</b>   | 29.36426735  | 27.93149948  |
| E11 | 478411_mir | <b>ath-miR159a</b>     | 29.20478821  | 30.32966423  |
| E12 | 477857_mir | <b>hsa-miR-181a-5p</b> | 29.77189445  | 29.34418678  |
| F1  | 477935_mir | <b>hsa-miR-182-5p</b>  | Undetermined | Undetermined |
| F2  | 477939_mir | <b>hsa-miR-185-5p</b>  | 30.46379471  | 30.66148376  |

## Supplementary Material

|     |            |                                        |              |              |
|-----|------------|----------------------------------------|--------------|--------------|
| F3  | 477940_mir | <b>hsa-miR-186-5p</b>                  | 33.61295319  | 31.654459    |
| F4  | 477944_mir | <b>hsa-miR-18a-3p</b>                  | 36.9539299   | Undetermined |
| F5  | 478551_mir | <b>hsa-miR-18a-5p</b>                  | 33.0226593   | 32.60070038  |
| F6  | 478584_mir | <b>hsa-miR-18b-5p</b>                  | 35.00074387  | 34.13450623  |
| F7  | 478358_mir | <b>hsa-miR-190a-5p</b>                 | 38.07269287  | 36.1680069   |
| F8  | 477952_mir | <b>hsa-miR-191-5p</b>                  | 29.88350296  | 29.10382652  |
| F9  | 478262_mir | <b>hsa-miR-192-5p</b>                  | 28.84110832  | 29.39526558  |
| F10 | 478314_mir | <b>hsa-miR-193b-3p</b>                 | Undetermined | 31.2579689   |
| F11 | 477956_mir | <b>hsa-miR-194-5p</b>                  | 33.23752594  | 32.20273209  |
| F12 | 477957_mir | <b>hsa-miR-195-5p</b>                  | 31.60767365  | Undetermined |
| G1  | 477959_mir | <b>hsa-miR-197-3p</b>                  | Undetermined | 24.18584442  |
| G2  | 477961_mir | <b>hsa-miR-199a-3p_hsa-miR-199b-3p</b> | 29.94068336  | 28.73979568  |
| G3  | 478231_mir | <b>hsa-miR-199a-5p</b>                 | Undetermined | 31.90057564  |
| G4  | 479228_mir | <b>hsa-miR-19a-3p</b>                  | 32.55803299  | 30.88954735  |
| G5  | 478264_mir | <b>hsa-miR-19b-3p</b>                  | 32.69347763  | 31.01452827  |
| G6  | 478490_mir | <b>hsa-miR-200a-3p</b>                 | 34.42556381  | 33.70599365  |
| G7  | 478351_mir | <b>hsa-miR-200c-3p</b>                 | 34.90829468  | 34.592556    |
| G8  | 478491_mir | <b>hsa-miR-204-5p</b>                  | 37.10448837  | 38.22386932  |
| G9  | 477967_mir | <b>hsa-miR-205-5p</b>                  | 27.96895599  | 28.09300613  |
| G10 | 477819_mir | <b>hsa-miR-208a-3p</b>                 | Undetermined | Undetermined |
| G11 | 478317_mir | <b>hsa-miR-20a-3p</b>                  | 29.05567551  | Undetermined |
| G12 | 478586_mir | <b>hsa-miR-20a-5p</b>                  | 28.69412422  | 28.2353878   |

|     |            |                       |              |              |
|-----|------------|-----------------------|--------------|--------------|
| H1  | 477804_mir | <b>hsa-miR-20b-5p</b> | Undetermined | 31.00663376  |
| H2  | 477973_mir | <b>hsa-miR-21-3p</b>  | Undetermined | 34.49645233  |
| H3  | 477975_mir | <b>hsa-miR-21-5p</b>  | 27.98845291  | 27.52995491  |
| H4  | 477970_mir | <b>hsa-miR-210-3p</b> | 34.12370682  | 32.45740128  |
| H5  | 477971_mir | <b>hsa-miR-2110</b>   | 37.86182022  | 36.23454666  |
| H6  | 478516_mir | <b>hsa-miR-215-5p</b> | Undetermined | Undetermined |
| H7  | 477985_mir | <b>hsa-miR-22-3p</b>  | 28.42376709  | 28.14249229  |
| H8  | 477987_mir | <b>hsa-miR-22-5p</b>  | Undetermined | 33.36706924  |
| H9  | 477981_mir | <b>hsa-miR-221-3p</b> | 27.92764473  | 27.34396172  |
| H10 | 477982_mir | <b>hsa-miR-222-3p</b> | 34.298172    | 34.84630966  |
| H11 | 477983_mir | <b>hsa-miR-223-3p</b> | 25.41051483  | 25.47878075  |
| H12 | 477984_mir | <b>hsa-miR-223-5p</b> | Undetermined | Undetermined |

| <b>PLATE 2</b> | <b>ID</b>  | <b>miRNA</b>          | <b>C<sub>T</sub> (T0)</b> | <b>C<sub>T</sub> (T12)</b> |
|----------------|------------|-----------------------|---------------------------|----------------------------|
| A1             | 477860_mir | <b>hsa-miR-16-5p</b>  | 27.77269173               | 26.43927193                |
| A2             | 477986_mir | <b>hsa-miR-224-5p</b> | 32.59539413               | 32.74313354                |
| A3             | 478532_mir | <b>hsa-miR-23a-3p</b> | 29.72961235               | 30.02237892                |
| A4             | 478602_mir | <b>hsa-miR-23b-3p</b> | 31.22785568               | 30.95518494                |
| A5             | 477992_mir | <b>hsa-miR-24-3p</b>  | 29.69152451               | 28.03481102                |
| A6             | 477994_mir | <b>hsa-miR-25-3p</b>  | 28.64697266               | 27.82489777                |
| A7             | 477995_mir | <b>hsa-miR-26a-5p</b> | 27.81258774               | 27.3546505                 |
| A8             | 478418_mir | <b>hsa-miR-26b-5p</b> | 27.35288239               | 26.82007408                |
| A9             | 478384_mir | <b>hsa-miR-27a-3p</b> | 29.97758675               | 29.907938                  |

|     |            |                         |              |              |
|-----|------------|-------------------------|--------------|--------------|
| A10 | 478270_mir | <b>hsa-miR-27b-3p</b>   | 31.96850395  | 32.11865616  |
| A11 | 477999_mir | <b>hsa-miR-28-3p</b>    | 35.77980423  | 33.64974213  |
| A12 | 478293_mir | <b>cel-miR-39-3p</b>    | Undetermined | Undetermined |
| B1  | 478000_mir | <b>hsa-miR-28-5p</b>    | 34.04742813  | 35.47568512  |
| B2  | 477836_mir | <b>hsa-miR-296-5p</b>   | Undetermined | Undetermined |
| B3  | 478587_mir | <b>hsa-miR-29a-3p</b>   | 30.67967224  | 31.33153343  |
| B4  | 478002_mir | <b>hsa-miR-29a-5p</b>   | 29.01394272  | 28.70182228  |
| B5  | 478003_mir | <b>hsa-miR-29b-2-5p</b> | Undetermined | Undetermined |
| B6  | 478369_mir | <b>hsa-miR-29b-3p</b>   | 32.03409195  | 31.32423401  |
| B7  | 479229_mir | <b>hsa-miR-29c-3p</b>   | Undetermined | 31.01079178  |
| B8  | 477815_mir | <b>hsa-miR-301a-3p</b>  | Undetermined | Undetermined |
| B9  | 477825_mir | <b>hsa-miR-301b-3p</b>  | Undetermined | Undetermined |
| B10 | 479448_mir | <b>hsa-miR-30a-5p</b>   | Undetermined | Undetermined |
| B11 | 478007_mir | <b>hsa-miR-30b-5p</b>   | 29.19677353  | 28.88189888  |
| B12 | 478008_mir | <b>hsa-miR-30c-5p</b>   | Undetermined | 28.90625572  |
| C1  | 478606_mir | <b>hsa-miR-30d-5p</b>   | 35.02662659  | 34.47704315  |
| C2  | 478388_mir | <b>hsa-miR-30e-3p</b>   | Undetermined | Undetermined |
| C3  | 479235_mir | <b>hsa-miR-30e-5p</b>   | Undetermined | 30.7750473   |
| C4  | 478015_mir | <b>hsa-miR-31-5p</b>    | 35.08982849  | 36.20032501  |
| C5  | 478026_mir | <b>hsa-miR-32-5p</b>    | Undetermined | Undetermined |
| C6  | 478594_mir | <b>hsa-miR-320a</b>     | 28.69087219  | 29.31896019  |
| C7  | 478588_mir | <b>hsa-miR-320b</b>     | 30.86668587  | 31.12192535  |

|     |            |                        |              |              |
|-----|------------|------------------------|--------------|--------------|
| C8  | 478022_mir | <b>hsa-miR-320e</b>    | 28.81337166  | 28.89036179  |
| C9  | 478023_mir | <b>hsa-miR-324-3p</b>  | Undetermined | 29.7976265   |
| C10 | 478024_mir | <b>hsa-miR-324-5p</b>  | 31.36130714  | 30.15415192  |
| C11 | 478027_mir | <b>hsa-miR-326</b>     | 36.87876511  | 31.31696892  |
| C12 | 478028_mir | <b>hsa-miR-328-3p</b>  | 32.32848358  | Undetermined |
| D1  | 478323_mir | <b>hsa-miR-331-3p</b>  | Undetermined | 31.75607491  |
| D2  | 478324_mir | <b>hsa-miR-335-5p</b>  | Undetermined | Undetermined |
| D3  | 478037_mir | <b>hsa-miR-338-3p</b>  | Undetermined | 34.54976273  |
| D4  | 478325_mir | <b>hsa-miR-339-3p</b>  | 35.00676727  | 34.32398987  |
| D5  | 478040_mir | <b>hsa-miR-339-5p</b>  | 32.93803024  | 33.29735565  |
| D6  | 478347_mir | <b>hsa-miR-33a-5p</b>  | Undetermined | 33.20317841  |
| D7  | 478043_mir | <b>hsa-miR-342-3p</b>  | 31.91996002  | 30.93192863  |
| D8  | 478046_mir | <b>hsa-miR-346</b>     | Undetermined | Undetermined |
| D9  | 478048_mir | <b>hsa-miR-34a-5p</b>  | Undetermined | Undetermined |
| D10 | 478055_mir | <b>hsa-miR-361-3p</b>  | 33.16503143  | 37.48524475  |
| D11 | 478060_mir | <b>hsa-miR-363-3p</b>  | Undetermined | 32.62764359  |
| D12 | 478065_mir | <b>hsa-miR-365a-3p</b> | Undetermined | Undetermined |
| E1  | 478363_mir | <b>hsa-miR-373-3p</b>  | 35.99824142  | 36.32544708  |
| E2  | 478073_mir | <b>hsa-miR-373-5p</b>  | Undetermined | 36.82288742  |
| E3  | 478238_mir | <b>hsa-miR-374a-5p</b> | 34.54343414  | 33.97453308  |
| E4  | 478389_mir | <b>hsa-miR-374b-5p</b> | 33.54689407  | 32.9817276   |
| E5  | 478074_mir | <b>hsa-miR-375</b>     | 25.49435997  | 27.4288311   |
| E6  | 478240_mir | <b>hsa-miR-376a-3p</b> | 32.20997238  | 33.58529663  |

## Supplementary Material

|     |            |                        |              |              |
|-----|------------|------------------------|--------------|--------------|
| E7  | 478349_mir | <b>hsa-miR-378a-3p</b> | 33.4217186   | 33.54700851  |
| E8  | 478078_mir | <b>hsa-miR-382-5p</b>  | Undetermined | Undetermined |
| E9  | 478084_mir | <b>hsa-miR-409-3p</b>  | Undetermined | 39.14609909  |
| E10 | 478088_mir | <b>hsa-miR-421</b>     | Undetermined | Undetermined |
| E11 | 478327_mir | <b>hsa-miR-423-3p</b>  | 31.59069633  | 31.04014778  |
| E12 | 478090_mir | <b>hsa-miR-423-5p</b>  | 29.00276375  | 28.07009315  |
| F1  | 478092_mir | <b>hsa-miR-424-5p</b>  | 32.49365997  | 30.70918846  |
| F2  | 478093_mir | <b>hsa-miR-425-3p</b>  | Undetermined | Undetermined |
| F3  | 478094_mir | <b>hsa-miR-425-5p</b>  | 31.19877052  | 30.31438828  |
| F4  | 478107_mir | <b>hsa-miR-451a</b>    | 21.85524368  | 21.67033005  |
| F5  | 478122_mir | <b>hsa-miR-483-3p</b>  | 31.12688446  | 33.36904144  |
| F6  | 478432_mir | <b>hsa-miR-483-5p</b>  | 32.038517    | 32.43738937  |
| F7  | 478308_mir | <b>hsa-miR-484</b>     | 30.569664    | 30.0887661   |
| F8  | 478125_mir | <b>hsa-miR-485-3p</b>  | Undetermined | Undetermined |
| F9  | 478128_mir | <b>hsa-miR-486-5p</b>  | 28.55716133  | 27.15333748  |
| F10 | 478136_mir | <b>hsa-miR-495-3p</b>  | 37.64415359  | 36.4057579   |
| F11 | 478138_mir | <b>hsa-miR-497-5p</b>  | Undetermined | Undetermined |
| F12 | 478309_mir | <b>hsa-miR-500a-5p</b> | Undetermined | Undetermined |
| G1  | 478350_mir | <b>hsa-miR-501-3p</b>  | 31.11302757  | 30.74193764  |
| G2  | 478348_mir | <b>hsa-miR-502-3p</b>  | 29.84033394  | 30.41969872  |
| G3  | 478145_mir | <b>hsa-miR-505-3p</b>  | 34.9071312   | 33.83415604  |
| G4  | 478336_mir | <b>hsa-miR-532-3p</b>  | 28.20897675  | 29.07426071  |



|     |            |                        |              |              |
|-----|------------|------------------------|--------------|--------------|
| G5  | 478151_mir | <b>hsa-miR-532-5p</b>  | Undetermined | Undetermined |
| G6  | 478155_mir | <b>hsa-miR-543</b>     | 33.52133942  | Undetermined |
| G7  | 478158_mir | <b>hsa-miR-551a</b>    | 30.58221817  | 31.96788979  |
| G8  | 478159_mir | <b>hsa-miR-551b-3p</b> | Undetermined | 31.47094536  |
| G9  | 478163_mir | <b>hsa-miR-574-3p</b>  | Undetermined | Undetermined |
| G10 | 478167_mir | <b>hsa-miR-584-5p</b>  | 26.34005165  | 27.03897667  |
| G11 | 478367_mir | <b>hsa-miR-590-5p</b>  | Undetermined | 32.80963135  |
| G12 | 478174_mir | <b>hsa-miR-605-5p</b>  | Undetermined | Undetermined |
| H1  | 478183_mir | <b>hsa-miR-629-5p</b>  | Undetermined | Undetermined |
| H2  | 478189_mir | <b>hsa-miR-652-3p</b>  | 29.93979836  | 28.24447632  |
| H3  | 478192_mir | <b>hsa-miR-660-5p</b>  | 34.07609558  | 33.51945877  |
| H4  | 478342_mir | <b>hsa-miR-766-3p</b>  | Undetermined | Undetermined |
| H5  | 478207_mir | <b>hsa-miR-885-5p</b>  | Undetermined | 33.82443237  |
| H6  | 477827_mir | <b>hsa-miR-92a-3p</b>  | 26.7600708   | 26.82304192  |
| H7  | 477823_mir | <b>hsa-miR-92b-3p</b>  | 27.56397057  | 27.94299126  |
| H8  | 478209_mir | <b>hsa-miR-93-3p</b>   | Undetermined | 35.20497131  |
| H9  | 478210_mir | <b>hsa-miR-93-5p</b>   | 30.66248894  | 30.32363701  |
| H10 | 478213_mir | <b>hsa-miR-95-3p</b>   | Undetermined | Undetermined |
| H11 | 478519_mir | <b>hsa-miR-99a-5p</b>  | Undetermined | Undetermined |
| H12 | 478343_mir | <b>hsa-miR-99b-5p</b>  | 33.22515488  | 35.08739853  |

2. The  $C_T$  value of 180 unique miRNAs evaluated at T(0) and T(12)

| <b>Plate 1</b> |            |                        | <b>T(0)</b>  |
|----------------|------------|------------------------|--------------|
| <b>Well</b>    | <b>ID</b>  | <b>miRNA</b>           | <b>Cr</b>    |
| A2             | 478575_mir | <b>hsa-let-7a-5p</b>   | 30.23466873  |
| A3             | 478221_mir | <b>hsa-let-7b-3p</b>   | 32.71641159  |
| A4             | 478576_mir | <b>hsa-let-7b-5p</b>   | 34.08200455  |
| A5             | 478577_mir | <b>hsa-let-7c-5p</b>   | Undetermined |
| A6             | 477848_mir | <b>hsa-let-7d-3p</b>   | Undetermined |
| A7             | 478439_mir | <b>hsa-let-7d-5p</b>   | 32.24302673  |
| A8             | 478579_mir | <b>hsa-let-7e-5p</b>   | Undetermined |
| A9             | 478578_mir | <b>hsa-let-7f-5p</b>   | 32.30392075  |
| A10            | 478580_mir | <b>hsa-let-7g-5p</b>   | 32.25228882  |
| A11            | 477862_mir | <b>hsa-let-7i-3p</b>   | 34.33986282  |
| A12            | 478375_mir | <b>hsa-let-7i-5p</b>   | 29.83022499  |
| B1             | 477820_mir | <b>hsa-miR-1-3p</b>    | 28.52332115  |
| B2             | 477863_mir | <b>hsa-miR-101-3p</b>  | 31.71281242  |
| B3             | 478253_mir | <b>hsa-miR-103a-3p</b> | 32.35660553  |
| B4             | 478225_mir | <b>hsa-miR-106a-5p</b> | Undetermined |
| B5             | 477866_mir | <b>hsa-miR-106b-3p</b> | Undetermined |
| B6             | 478412_mir | <b>hsa-miR-106b-5p</b> | Undetermined |

|     |            |                        |              |
|-----|------------|------------------------|--------------|
| B7  | 478254_mir | <b>hsa-miR-107</b>     | 34.0449295   |
| B8  | 479241_mir | <b>hsa-miR-10a-5p</b>  | 34.46384048  |
| B9  | 478494_mir | <b>hsa-miR-10b-5p</b>  | 32.19300461  |
| B10 | 477855_mir | <b>hsa-miR-122-5p</b>  | 32.25159073  |
| B11 | 477884_mir | <b>hsa-miR-125a-5p</b> | 30.86580849  |
| B12 | 477885_mir | <b>hsa-miR-125b-5p</b> | 28.57684898  |
| C1  | 477887_mir | <b>hsa-miR-126-3p</b>  | 27.9211731   |
| C2  | 477889_mir | <b>hsa-miR-127-3p</b>  | Undetermined |
| C3  | 477892_mir | <b>hsa-miR-128-3p</b>  | 32.40904617  |
| C4  | 477851_mir | <b>hsa-miR-130a-3p</b> | 32.07991791  |
| C5  | 477840_mir | <b>hsa-miR-130b-3p</b> | Undetermined |
| C6  | 477900_mir | <b>hsa-miR-132-3p</b>  | Undetermined |
| C7  | 478511_mir | <b>hsa-miR-133a-3p</b> | Undetermined |
| C8  | 480871_mir | <b>hsa-miR-133b</b>    | Undetermined |
| C9  | 478307_mir | <b>hsa-miR-136-5p</b>  | Undetermined |
| C10 | 478312_mir | <b>hsa-miR-139-5p</b>  | 31.50261879  |
| C11 | 477908_mir | <b>hsa-miR-140-3p</b>  | 33.10882568  |
| C12 | 477909_mir | <b>hsa-miR-140-5p</b>  | Undetermined |
| D1  | 478501_mir | <b>hsa-miR-141-3p</b>  | Undetermined |
| D2  | 477910_mir | <b>hsa-miR-142-3p</b>  | 30.31755257  |
| D3  | 477911_mir | <b>hsa-miR-142-5p</b>  | Undetermined |
| D4  | 477912_mir | <b>hsa-miR-143-3p</b>  | 31.26897621  |
| D5  | 477913_mir | <b>hsa-miR-144-3p</b>  | 26.41192818  |

|     |            |                        |              |
|-----|------------|------------------------|--------------|
| D6  | 477914_mir | <b>hsa-miR-144-5p</b>  | Undetermined |
| D7  | 477916_mir | <b>hsa-miR-145-5p</b>  | Undetermined |
| D8  | 478399_mir | <b>hsa-miR-146a-5p</b> | 28.52252769  |
| D9  | 478513_mir | <b>hsa-miR-146b-5p</b> | Undetermined |
| D10 | 477814_mir | <b>hsa-miR-148a-3p</b> | 31.11049271  |
| D11 | 477824_mir | <b>hsa-miR-148b-3p</b> | 32.5416832   |
| D12 | 477918_mir | <b>hsa-miR-150-5p</b>  | 27.15849495  |
| E1  | 477919_mir | <b>hsa-miR-151a-3p</b> | 31.65749931  |
| E2  | 478505_mir | <b>hsa-miR-151a-5p</b> | 32.98652649  |
| E3  | 477921_mir | <b>hsa-miR-152-3p</b>  | Undetermined |
| E4  | 477925_mir | <b>hsa-miR-154-5p</b>  | Undetermined |
| E5  | 477927_mir | <b>hsa-miR-155-5p</b>  | 36.60807419  |
| E6  | 477858_mir | <b>hsa-miR-15a-5p</b>  | 29.92562103  |
| E7  | 477929_mir | <b>hsa-miR-15b-3p</b>  | Undetermined |
| E8  | 478313_mir | <b>hsa-miR-15b-5p</b>  | 28.71093941  |
| E9  | 477931_mir | <b>hsa-miR-16-2-3p</b> | 33.36393738  |
| E10 | 478447_mir | <b>hsa-miR-17-5p</b>   | 29.36426735  |
| E12 | 477857_mir | <b>hsa-miR-181a-5p</b> | 29.77189445  |
| F1  | 477935_mir | <b>hsa-miR-182-5p</b>  | Undetermined |
| F2  | 477939_mir | <b>hsa-miR-185-5p</b>  | 30.46379471  |
| F3  | 477940_mir | <b>hsa-miR-186-5p</b>  | 33.61295319  |
| F4  | 477944_mir | <b>hsa-miR-18a-3p</b>  | 36.9539299   |

|     |            |                                        |              |
|-----|------------|----------------------------------------|--------------|
| F5  | 478551_mir | <b>hsa-miR-18a-5p</b>                  | 33.0226593   |
| F6  | 478584_mir | <b>hsa-miR-18b-5p</b>                  | 35.00074387  |
| F7  | 478358_mir | <b>hsa-miR-190a-5p</b>                 | 38.07269287  |
| F8  | 477952_mir | <b>hsa-miR-191-5p</b>                  | 29.88350296  |
| F9  | 478262_mir | <b>hsa-miR-192-5p</b>                  | 28.84110832  |
| F10 | 478314_mir | <b>hsa-miR-193b-3p</b>                 | Undetermined |
| F11 | 477956_mir | <b>hsa-miR-194-5p</b>                  | 33.23752594  |
| F12 | 477957_mir | <b>hsa-miR-195-5p</b>                  | 31.60767365  |
| G1  | 477959_mir | <b>hsa-miR-197-3p</b>                  | Undetermined |
| G2  | 477961_mir | <b>hsa-miR-199a-3p_hsa-miR-199b-3p</b> | 29.94068336  |
| G3  | 478231_mir | <b>hsa-miR-199a-5p</b>                 | Undetermined |
| G4  | 479228_mir | <b>hsa-miR-19a-3p</b>                  | 32.55803299  |
| G5  | 478264_mir | <b>hsa-miR-19b-3p</b>                  | 32.69347763  |
| G6  | 478490_mir | <b>hsa-miR-200a-3p</b>                 | 34.42556381  |
| G7  | 478351_mir | <b>hsa-miR-200c-3p</b>                 | 34.90829468  |
| G8  | 478491_mir | <b>hsa-miR-204-5p</b>                  | 37.10448837  |
| G9  | 477967_mir | <b>hsa-miR-205-5p</b>                  | 27.96895599  |
| G10 | 477819_mir | <b>hsa-miR-208a-3p</b>                 | Undetermined |
| G11 | 478317_mir | <b>hsa-miR-20a-3p</b>                  | 29.05567551  |
| G12 | 478586_mir | <b>hsa-miR-20a-5p</b>                  | 28.69412422  |
| H1  | 477804_mir | <b>hsa-miR-20b-5p</b>                  | Undetermined |
| H2  | 477973_mir | <b>hsa-miR-21-3p</b>                   | Undetermined |

|                |            |                       |                      |
|----------------|------------|-----------------------|----------------------|
| H3             | 477975_mir | <b>hsa-miR-21-5p</b>  | 27.98845291          |
| H4             | 477970_mir | <b>hsa-miR-210-3p</b> | 34.12370682          |
| H5             | 477971_mir | <b>hsa-miR-2110</b>   | 37.86182022          |
| H6             | 478516_mir | <b>hsa-miR-215-5p</b> | Undetermined         |
| H7             | 477985_mir | <b>hsa-miR-22-3p</b>  | 28.42376709          |
| H8             | 477987_mir | <b>hsa-miR-22-5p</b>  | Undetermined         |
| H9             | 477981_mir | <b>hsa-miR-221-3p</b> | 27.92764473          |
| H10            | 477982_mir | <b>hsa-miR-222-3p</b> | 34.298172            |
| H11            | 477983_mir | <b>hsa-miR-223-3p</b> | 25.41051483          |
| H12            | 477984_mir | <b>hsa-miR-223-5p</b> | Undetermined         |
| <b>Plate 2</b> |            |                       | <b>T(0)</b>          |
| <b>Well</b>    | <b>ID</b>  | <b>miRNA</b>          | <b>C<sub>T</sub></b> |
| A2             | 477986_mir | <b>hsa-miR-224-5p</b> | 32.59539413          |
| A3             | 478532_mir | <b>hsa-miR-23a-3p</b> | 29.72961235          |
| A4             | 478602_mir | <b>hsa-miR-23b-3p</b> | 31.22785568          |
| A5             | 477992_mir | <b>hsa-miR-24-3p</b>  | 29.69152451          |
| A6             | 477994_mir | <b>hsa-miR-25-3p</b>  | 28.64697266          |
| A7             | 477995_mir | <b>hsa-miR-26a-5p</b> | 27.81258774          |
| A8             | 478418_mir | <b>hsa-miR-26b-5p</b> | 27.35288239          |
| A9             | 478384_mir | <b>hsa-miR-27a-3p</b> | 29.97758675          |
| A10            | 478270_mir | <b>hsa-miR-27b-3p</b> | 31.96850395          |
| A11            | 477999_mir | <b>hsa-miR-28-3p</b>  | 35.77980423          |

|     |            |                         |              |
|-----|------------|-------------------------|--------------|
| B1  | 478000_mir | <b>hsa-miR-28-5p</b>    | 34.04742813  |
| B2  | 477836_mir | <b>hsa-miR-296-5p</b>   | Undetermined |
| B3  | 478587_mir | <b>hsa-miR-29a-3p</b>   | 30.67967224  |
| B4  | 478002_mir | <b>hsa-miR-29a-5p</b>   | 29.01394272  |
| B5  | 478003_mir | <b>hsa-miR-29b-2-5p</b> | Undetermined |
| B6  | 478369_mir | <b>hsa-miR-29b-3p</b>   | 32.03409195  |
| B7  | 479229_mir | <b>hsa-miR-29c-3p</b>   | Undetermined |
| B8  | 477815_mir | <b>hsa-miR-301a-3p</b>  | Undetermined |
| B9  | 477825_mir | <b>hsa-miR-301b-3p</b>  | Undetermined |
| B10 | 479448_mir | <b>hsa-miR-30a-5p</b>   | Undetermined |
| B11 | 478007_mir | <b>hsa-miR-30b-5p</b>   | 29.19677353  |
| B12 | 478008_mir | <b>hsa-miR-30c-5p</b>   | Undetermined |
| C1  | 478606_mir | <b>hsa-miR-30d-5p</b>   | 35.02662659  |
| C2  | 478388_mir | <b>hsa-miR-30e-3p</b>   | Undetermined |
| C3  | 479235_mir | <b>hsa-miR-30e-5p</b>   | Undetermined |
| C4  | 478015_mir | <b>hsa-miR-31-5p</b>    | 35.08982849  |
| C5  | 478026_mir | <b>hsa-miR-32-5p</b>    | Undetermined |
| C6  | 478594_mir | <b>hsa-miR-320a</b>     | 28.69087219  |
| C7  | 478588_mir | <b>hsa-miR-320b</b>     | 30.86668587  |
| C8  | 478022_mir | <b>hsa-miR-320e</b>     | 28.81337166  |
| C9  | 478023_mir | <b>hsa-miR-324-3p</b>   | Undetermined |
| C10 | 478024_mir | <b>hsa-miR-324-5p</b>   | 31.36130714  |
| C11 | 478027_mir | <b>hsa-miR-326</b>      | 36.87876511  |

|     |            |                                        |              |
|-----|------------|----------------------------------------|--------------|
| C12 | 478028_mir | <b>hsa-miR-328-3p</b>                  | 32.32848358  |
| D1  | 478323_mir | <b>hsa-miR-331-3p</b>                  | Undetermined |
| D2  | 478324_mir | <b>hsa-miR-335-5p</b>                  | Undetermined |
| D3  | 478037_mir | <b>hsa-miR-338-3p</b>                  | Undetermined |
| D4  | 478325_mir | <b>hsa-miR-339-3p</b>                  | 35.00676727  |
| D5  | 478040_mir | <b>hsa-miR-339-5p</b>                  | 32.93803024  |
| D6  | 478347_mir | <b>hsa-miR-33a-5p</b>                  | Undetermined |
| D7  | 478043_mir | <b>hsa-miR-342-3p</b>                  | 31.91996002  |
| D8  | 478046_mir | <b>hsa-miR-346</b>                     | Undetermined |
| D9  | 478048_mir | <b>hsa-miR-34a-5p</b>                  | Undetermined |
| D10 | 478055_mir | <b>hsa-miR-361-3p</b>                  | 33.16503143  |
| D11 | 478060_mir | <b>hsa-miR-363-3p</b>                  | Undetermined |
| D12 | 478065_mir | <b>hsa-miR-365a-3p_hsa-miR-365b-3p</b> | Undetermined |
| E1  | 478363_mir | <b>hsa-miR-373-3p</b>                  | 35.99824142  |
| E2  | 478073_mir | <b>hsa-miR-373-5p</b>                  | Undetermined |
| E3  | 478238_mir | <b>hsa-miR-374a-5p</b>                 | 34.54343414  |
| E4  | 478389_mir | <b>hsa-miR-374b-5p</b>                 | 33.54689407  |
| E5  | 478074_mir | <b>hsa-miR-375</b>                     | 25.49435997  |
| E6  | 478240_mir | <b>hsa-miR-376a-3p</b>                 | 32.20997238  |
| E7  | 478349_mir | <b>hsa-miR-378a-3p</b>                 | 33.4217186   |
| E8  | 478078_mir | <b>hsa-miR-382-5p</b>                  | Undetermined |
| E9  | 478084_mir | <b>hsa-miR-409-3p</b>                  | Undetermined |



|     |            |                        |              |
|-----|------------|------------------------|--------------|
| E10 | 478088_mir | <b>hsa-miR-421</b>     | Undetermined |
| E11 | 478327_mir | <b>hsa-miR-423-3p</b>  | 31.59069633  |
| E12 | 478090_mir | <b>hsa-miR-423-5p</b>  | 29.00276375  |
| F1  | 478092_mir | <b>hsa-miR-424-5p</b>  | 32.49365997  |
| F2  | 478093_mir | <b>hsa-miR-425-3p</b>  | Undetermined |
| F3  | 478094_mir | <b>hsa-miR-425-5p</b>  | 31.19877052  |
| F4  | 478107_mir | <b>hsa-miR-451a</b>    | 21.85524368  |
| F5  | 478122_mir | <b>hsa-miR-483-3p</b>  | 31.12688446  |
| F6  | 478432_mir | <b>hsa-miR-483-5p</b>  | 32.038517    |
| F7  | 478308_mir | <b>hsa-miR-484</b>     | 30.569664    |
| F8  | 478125_mir | <b>hsa-miR-485-3p</b>  | Undetermined |
| F9  | 478128_mir | <b>hsa-miR-486-5p</b>  | 28.55716133  |
| F10 | 478136_mir | <b>hsa-miR-495-3p</b>  | 37.64415359  |
| F11 | 478138_mir | <b>hsa-miR-497-5p</b>  | Undetermined |
| F12 | 478309_mir | <b>hsa-miR-500a-5p</b> | Undetermined |
| G1  | 478350_mir | <b>hsa-miR-501-3p</b>  | 31.11302757  |
| G2  | 478348_mir | <b>hsa-miR-502-3p</b>  | 29.84033394  |
| G3  | 478145_mir | <b>hsa-miR-505-3p</b>  | 34.9071312   |
| G4  | 478336_mir | <b>hsa-miR-532-3p</b>  | 28.20897675  |
| G5  | 478151_mir | <b>hsa-miR-532-5p</b>  | Undetermined |
| G6  | 478155_mir | <b>hsa-miR-543</b>     | 33.52133942  |
| G7  | 478158_mir | <b>hsa-miR-551a</b>    | 30.58221817  |
| G8  | 478159_mir | <b>hsa-miR-551b-3p</b> | Undetermined |

|     |            |                       |              |
|-----|------------|-----------------------|--------------|
| G9  | 478163_mir | <b>hsa-miR-574-3p</b> | Undetermined |
| G10 | 478167_mir | <b>hsa-miR-584-5p</b> | 26.34005165  |
| G11 | 478367_mir | <b>hsa-miR-590-5p</b> | Undetermined |
| G12 | 478174_mir | <b>hsa-miR-605-5p</b> | Undetermined |
| H1  | 478183_mir | <b>hsa-miR-629-5p</b> | Undetermined |
| H2  | 478189_mir | <b>hsa-miR-652-3p</b> | 29.93979836  |
| H3  | 478192_mir | <b>hsa-miR-660-5p</b> | 34.07609558  |
| H4  | 478342_mir | <b>hsa-miR-766-3p</b> | Undetermined |
| H5  | 478207_mir | <b>hsa-miR-885-5p</b> | Undetermined |
| H6  | 477827_mir | <b>hsa-miR-92a-3p</b> | 26.7600708   |
| H7  | 477823_mir | <b>hsa-miR-92b-3p</b> | 27.56397057  |
| H8  | 478209_mir | <b>hsa-miR-93-3p</b>  | Undetermined |
| H9  | 478210_mir | <b>hsa-miR-93-5p</b>  | 30.66248894  |
| H10 | 478213_mir | <b>hsa-miR-95-3p</b>  | Undetermined |
| H11 | 478519_mir | <b>hsa-miR-99a-5p</b> | Undetermined |
| H12 | 478343_mir | <b>hsa-miR-99b-5p</b> | 33.22515488  |

| <b>Plate 1</b> |            |                      | <b>T(12)</b> |
|----------------|------------|----------------------|--------------|
| <b>Well</b>    | <b>ID</b>  | <b>miRNA</b>         | <b>Cr</b>    |
| A2             | 478575_mir | <b>hsa-let-7a-5p</b> | 28.90431595  |
| A3             | 478221_mir | <b>hsa-let-7b-3p</b> | 31.45339203  |

|     |            |                        |              |
|-----|------------|------------------------|--------------|
| A4  | 478576_mir | <b>hsa-let-7b-5p</b>   | 31.86747932  |
| A5  | 478577_mir | <b>hsa-let-7c-5p</b>   | 32.85919189  |
| A6  | 477848_mir | <b>hsa-let-7d-3p</b>   | 29.93468475  |
| A7  | 478439_mir | <b>hsa-let-7d-5p</b>   | 32.57905197  |
| A8  | 478579_mir | <b>hsa-let-7e-5p</b>   | 28.68997765  |
| A9  | 478578_mir | <b>hsa-let-7f-5p</b>   | 30.90026665  |
| A10 | 478580_mir | <b>hsa-let-7g-5p</b>   | 30.12475967  |
| A11 | 477862_mir | <b>hsa-let-7i-3p</b>   | 33.7143631   |
| A12 | 478375_mir | <b>hsa-let-7i-5p</b>   | 30.43766022  |
| B1  | 477820_mir | <b>hsa-miR-1-3p</b>    | 26.75643158  |
| B2  | 477863_mir | <b>hsa-miR-101-3p</b>  | 29.34156227  |
| B3  | 478253_mir | <b>hsa-miR-103a-3p</b> | 32.65026093  |
| B4  | 478225_mir | <b>hsa-miR-106a-5p</b> | Undetermined |
| B5  | 477866_mir | <b>hsa-miR-106b-3p</b> | 38.74437714  |
| B6  | 478412_mir | <b>hsa-miR-106b-5p</b> | 29.01012421  |
| B7  | 478254_mir | <b>hsa-miR-107</b>     | 33.58921814  |
| B8  | 479241_mir | <b>hsa-miR-10a-5p</b>  | 31.45865822  |
| B9  | 478494_mir | <b>hsa-miR-10b-5p</b>  | 32.58842087  |
| B10 | 477855_mir | <b>hsa-miR-122-5p</b>  | 30.13818359  |
| B11 | 477884_mir | <b>hsa-miR-125a-5p</b> | 29.67758179  |
| B12 | 477885_mir | <b>hsa-miR-125b-5p</b> | 30.17674828  |
| C1  | 477887_mir | <b>hsa-miR-126-3p</b>  | 27.3238678   |
| C2  | 477889_mir | <b>hsa-miR-127-3p</b>  | Undetermined |

|     |            |                        |              |
|-----|------------|------------------------|--------------|
| C3  | 477892_mir | <b>hsa-miR-128-3p</b>  | 32.24991608  |
| C4  | 477851_mir | <b>hsa-miR-130a-3p</b> | 31.8061924   |
| C5  | 477840_mir | <b>hsa-miR-130b-3p</b> | Undetermined |
| C6  | 477900_mir | <b>hsa-miR-132-3p</b>  | 32.49689865  |
| C7  | 478511_mir | <b>hsa-miR-133a-3p</b> | 39.0778656   |
| C8  | 480871_mir | <b>hsa-miR-133b</b>    | 39.36637115  |
| C9  | 478307_mir | <b>hsa-miR-136-5p</b>  | Undetermined |
| C10 | 478312_mir | <b>hsa-miR-139-5p</b>  | 30.35593224  |
| C11 | 477908_mir | <b>hsa-miR-140-3p</b>  | 33.57636261  |
| C12 | 477909_mir | <b>hsa-miR-140-5p</b>  | 31.84666634  |
| D1  | 478501_mir | <b>hsa-miR-141-3p</b>  | Undetermined |
| D2  | 477910_mir | <b>hsa-miR-142-3p</b>  | 28.44344711  |
| D3  | 477911_mir | <b>hsa-miR-142-5p</b>  | 29.97034836  |
| D4  | 477912_mir | <b>hsa-miR-143-3p</b>  | 30.53614235  |
| D5  | 477913_mir | <b>hsa-miR-144-3p</b>  | 23.88800621  |
| D6  | 477914_mir | <b>hsa-miR-144-5p</b>  | 31.07780266  |
| D7  | 477916_mir | <b>hsa-miR-145-5p</b>  | 28.73421097  |
| D8  | 478399_mir | <b>hsa-miR-146a-5p</b> | 27.58912468  |
| D9  | 478513_mir | <b>hsa-miR-146b-5p</b> | Undetermined |
| D10 | 477814_mir | <b>hsa-miR-148a-3p</b> | 32.21821213  |
| D11 | 477824_mir | <b>hsa-miR-148b-3p</b> | 31.71259499  |
| D12 | 477918_mir | <b>hsa-miR-150-5p</b>  | 27.30678368  |

|     |            |                        |              |
|-----|------------|------------------------|--------------|
| E1  | 477919_mir | <b>hsa-miR-151a-3p</b> | 33.51758194  |
| E2  | 478505_mir | <b>hsa-miR-151a-5p</b> | 31.01762009  |
| E3  | 477921_mir | <b>hsa-miR-152-3p</b>  | 31.51879692  |
| E4  | 477925_mir | <b>hsa-miR-154-5p</b>  | Undetermined |
| E5  | 477927_mir | <b>hsa-miR-155-5p</b>  | Undetermined |
| E6  | 477858_mir | <b>hsa-miR-15a-5p</b>  | 27.49378204  |
| E7  | 477929_mir | <b>hsa-miR-15b-3p</b>  | Undetermined |
| E8  | 478313_mir | <b>hsa-miR-15b-5p</b>  | 27.10866737  |
| E9  | 477931_mir | <b>hsa-miR-16-2-3p</b> | 32.87292862  |
| E10 | 478447_mir | <b>hsa-miR-17-5p</b>   | 27.93149948  |
| E12 | 477857_mir | <b>hsa-miR-181a-5p</b> | 29.34418678  |
| F1  | 477935_mir | <b>hsa-miR-182-5p</b>  | Undetermined |
| F2  | 477939_mir | <b>hsa-miR-185-5p</b>  | 30.66148376  |
| F3  | 477940_mir | <b>hsa-miR-186-5p</b>  | 31.654459    |
| F4  | 477944_mir | <b>hsa-miR-18a-3p</b>  | Undetermined |
| F5  | 478551_mir | <b>hsa-miR-18a-5p</b>  | 32.60070038  |
| F6  | 478584_mir | <b>hsa-miR-18b-5p</b>  | 34.13450623  |
| F7  | 478358_mir | <b>hsa-miR-190a-5p</b> | 36.1680069   |
| F8  | 477952_mir | <b>hsa-miR-191-5p</b>  | 29.10382652  |
| F9  | 478262_mir | <b>hsa-miR-192-5p</b>  | 29.39526558  |
| F10 | 478314_mir | <b>hsa-miR-193b-3p</b> | 31.2579689   |
| F11 | 477956_mir | <b>hsa-miR-194-5p</b>  | 32.20273209  |
| F12 | 477957_mir | <b>hsa-miR-195-5p</b>  | Undetermined |

|     |            |                                        |              |
|-----|------------|----------------------------------------|--------------|
| G1  | 477959_mir | <b>hsa-miR-197-3p</b>                  | 24.18584442  |
| G2  | 477961_mir | <b>hsa-miR-199a-3p_hsa-miR-199b-3p</b> | 28.73979568  |
| G3  | 478231_mir | <b>hsa-miR-199a-5p</b>                 | 31.90057564  |
| G4  | 479228_mir | <b>hsa-miR-19a-3p</b>                  | 30.88954735  |
| G5  | 478264_mir | <b>hsa-miR-19b-3p</b>                  | 31.01452827  |
| G6  | 478490_mir | <b>hsa-miR-200a-3p</b>                 | 33.70599365  |
| G7  | 478351_mir | <b>hsa-miR-200c-3p</b>                 | 34.592556    |
| G8  | 478491_mir | <b>hsa-miR-204-5p</b>                  | 38.22386932  |
| G9  | 477967_mir | <b>hsa-miR-205-5p</b>                  | 28.09300613  |
| G10 | 477819_mir | <b>hsa-miR-208a-3p</b>                 | Undetermined |
| G11 | 478317_mir | <b>hsa-miR-20a-3p</b>                  | Undetermined |
| G12 | 478586_mir | <b>hsa-miR-20a-5p</b>                  | 28.2353878   |
| H1  | 477804_mir | <b>hsa-miR-20b-5p</b>                  | 31.00663376  |
| H2  | 477973_mir | <b>hsa-miR-21-3p</b>                   | 34.49645233  |
| H3  | 477975_mir | <b>hsa-miR-21-5p</b>                   | 27.52995491  |
| H4  | 477970_mir | <b>hsa-miR-210-3p</b>                  | 32.45740128  |
| H5  | 477971_mir | <b>hsa-miR-2110</b>                    | 36.23454666  |
| H6  | 478516_mir | <b>hsa-miR-215-5p</b>                  | Undetermined |
| H7  | 477985_mir | <b>hsa-miR-22-3p</b>                   | 28.14249229  |
| H8  | 477987_mir | <b>hsa-miR-22-5p</b>                   | 33.36706924  |
| H9  | 477981_mir | <b>hsa-miR-221-3p</b>                  | 27.34396172  |
| H10 | 477982_mir | <b>hsa-miR-222-3p</b>                  | 34.84630966  |

|                |            |                         |              |
|----------------|------------|-------------------------|--------------|
| H11            | 477983_mir | <b>hsa-miR-223-3p</b>   | 25.47878075  |
| H12            | 477984_mir | <b>hsa-miR-223-5p</b>   | Undetermined |
| <b>Plate 2</b> |            |                         | <b>T(12)</b> |
| <b>Well</b>    | <b>ID</b>  | <b>miRNA</b>            | <b>Cr</b>    |
| A2             | 477986_mir | <b>hsa-miR-224-5p</b>   | 32.74313354  |
| A3             | 478532_mir | <b>hsa-miR-23a-3p</b>   | 30.02237892  |
| A4             | 478602_mir | <b>hsa-miR-23b-3p</b>   | 30.95518494  |
| A5             | 477992_mir | <b>hsa-miR-24-3p</b>    | 28.03481102  |
| A6             | 477994_mir | <b>hsa-miR-25-3p</b>    | 27.82489777  |
| A7             | 477995_mir | <b>hsa-miR-26a-5p</b>   | 27.3546505   |
| A8             | 478418_mir | <b>hsa-miR-26b-5p</b>   | 26.82007408  |
| A9             | 478384_mir | <b>hsa-miR-27a-3p</b>   | 29.907938    |
| A10            | 478270_mir | <b>hsa-miR-27b-3p</b>   | 32.11865616  |
| A11            | 477999_mir | <b>hsa-miR-28-3p</b>    | 33.64974213  |
| B1             | 478000_mir | <b>hsa-miR-28-5p</b>    | 35.47568512  |
| B2             | 477836_mir | <b>hsa-miR-296-5p</b>   | Undetermined |
| B3             | 478587_mir | <b>hsa-miR-29a-3p</b>   | 31.33153343  |
| B4             | 478002_mir | <b>hsa-miR-29a-5p</b>   | 28.70182228  |
| B5             | 478003_mir | <b>hsa-miR-29b-2-5p</b> | Undetermined |
| B6             | 478369_mir | <b>hsa-miR-29b-3p</b>   | 31.32423401  |
| B7             | 479229_mir | <b>hsa-miR-29c-3p</b>   | 31.01079178  |
| B8             | 477815_mir | <b>hsa-miR-301a-3p</b>  | Undetermined |
| B9             | 477825_mir | <b>hsa-miR-301b-3p</b>  | Undetermined |

|     |            |                       |              |
|-----|------------|-----------------------|--------------|
| B10 | 479448_mir | <b>hsa-miR-30a-5p</b> | Undetermined |
| B11 | 478007_mir | <b>hsa-miR-30b-5p</b> | 28.88189888  |
| B12 | 478008_mir | <b>hsa-miR-30c-5p</b> | 28.90625572  |
| C1  | 478606_mir | <b>hsa-miR-30d-5p</b> | 34.47704315  |
| C2  | 478388_mir | <b>hsa-miR-30e-3p</b> | Undetermined |
| C3  | 479235_mir | <b>hsa-miR-30e-5p</b> | 30.7750473   |
| C4  | 478015_mir | <b>hsa-miR-31-5p</b>  | 36.20032501  |
| C5  | 478026_mir | <b>hsa-miR-32-5p</b>  | Undetermined |
| C6  | 478594_mir | <b>hsa-miR-320a</b>   | 29.31896019  |
| C7  | 478588_mir | <b>hsa-miR-320b</b>   | 31.12192535  |
| C8  | 478022_mir | <b>hsa-miR-320e</b>   | 28.89036179  |
| C9  | 478023_mir | <b>hsa-miR-324-3p</b> | 29.7976265   |
| C10 | 478024_mir | <b>hsa-miR-324-5p</b> | 30.15415192  |
| C11 | 478027_mir | <b>hsa-miR-326</b>    | 31.31696892  |
| C12 | 478028_mir | <b>hsa-miR-328-3p</b> | Undetermined |
| D1  | 478323_mir | <b>hsa-miR-331-3p</b> | 31.75607491  |
| D2  | 478324_mir | <b>hsa-miR-335-5p</b> | Undetermined |
| D3  | 478037_mir | <b>hsa-miR-338-3p</b> | 34.54976273  |
| D4  | 478325_mir | <b>hsa-miR-339-3p</b> | 34.32398987  |
| D5  | 478040_mir | <b>hsa-miR-339-5p</b> | 33.29735565  |
| D6  | 478347_mir | <b>hsa-miR-33a-5p</b> | 33.20317841  |
| D7  | 478043_mir | <b>hsa-miR-342-3p</b> | 30.93192863  |



|     |            |                                        |              |
|-----|------------|----------------------------------------|--------------|
| D8  | 478046_mir | <b>hsa-miR-346</b>                     | Undetermined |
| D9  | 478048_mir | <b>hsa-miR-34a-5p</b>                  | Undetermined |
| D10 | 478055_mir | <b>hsa-miR-361-3p</b>                  | 37.48524475  |
| D11 | 478060_mir | <b>hsa-miR-363-3p</b>                  | 32.62764359  |
| D12 | 478065_mir | <b>hsa-miR-365a-3p_hsa-miR-365b-3p</b> | Undetermined |
| E1  | 478363_mir | <b>hsa-miR-373-3p</b>                  | 36.32544708  |
| E2  | 478073_mir | <b>hsa-miR-373-5p</b>                  | 36.82288742  |
| E3  | 478238_mir | <b>hsa-miR-374a-5p</b>                 | 33.97453308  |
| E4  | 478389_mir | <b>hsa-miR-374b-5p</b>                 | 32.9817276   |
| E5  | 478074_mir | <b>hsa-miR-375</b>                     | 27.4288311   |
| E6  | 478240_mir | <b>hsa-miR-376a-3p</b>                 | 33.58529663  |
| E7  | 478349_mir | <b>hsa-miR-378a-3p</b>                 | 33.54700851  |
| E8  | 478078_mir | <b>hsa-miR-382-5p</b>                  | Undetermined |
| E9  | 478084_mir | <b>hsa-miR-409-3p</b>                  | 39.14609909  |
| E10 | 478088_mir | <b>hsa-miR-421</b>                     | Undetermined |
| E11 | 478327_mir | <b>hsa-miR-423-3p</b>                  | 31.04014778  |
| E12 | 478090_mir | <b>hsa-miR-423-5p</b>                  | 28.07009315  |
| F1  | 478092_mir | <b>hsa-miR-424-5p</b>                  | 30.70918846  |
| F2  | 478093_mir | <b>hsa-miR-425-3p</b>                  | Undetermined |
| F3  | 478094_mir | <b>hsa-miR-425-5p</b>                  | 30.31438828  |
| F4  | 478107_mir | <b>hsa-miR-451a</b>                    | 21.67033005  |
| F5  | 478122_mir | <b>hsa-miR-483-3p</b>                  | 33.36904144  |

|     |            |                        |              |
|-----|------------|------------------------|--------------|
| F6  | 478432_mir | <b>hsa-miR-483-5p</b>  | 32.43738937  |
| F7  | 478308_mir | <b>hsa-miR-484</b>     | 30.0887661   |
| F8  | 478125_mir | <b>hsa-miR-485-3p</b>  | Undetermined |
| F9  | 478128_mir | <b>hsa-miR-486-5p</b>  | 27.15333748  |
| F10 | 478136_mir | <b>hsa-miR-495-3p</b>  | 36.4057579   |
| F11 | 478138_mir | <b>hsa-miR-497-5p</b>  | Undetermined |
| F12 | 478309_mir | <b>hsa-miR-500a-5p</b> | Undetermined |
| G1  | 478350_mir | <b>hsa-miR-501-3p</b>  | 30.74193764  |
| G2  | 478348_mir | <b>hsa-miR-502-3p</b>  | 30.41969872  |
| G3  | 478145_mir | <b>hsa-miR-505-3p</b>  | 33.83415604  |
| G4  | 478336_mir | <b>hsa-miR-532-3p</b>  | 29.07426071  |
| G5  | 478151_mir | <b>hsa-miR-532-5p</b>  | Undetermined |
| G6  | 478155_mir | <b>hsa-miR-543</b>     | Undetermined |
| G7  | 478158_mir | <b>hsa-miR-551a</b>    | 31.96788979  |
| G8  | 478159_mir | <b>hsa-miR-551b-3p</b> | 31.47094536  |
| G9  | 478163_mir | <b>hsa-miR-574-3p</b>  | Undetermined |
| G10 | 478167_mir | <b>hsa-miR-584-5p</b>  | 27.03897667  |
| G11 | 478367_mir | <b>hsa-miR-590-5p</b>  | 32.80963135  |
| G12 | 478174_mir | <b>hsa-miR-605-5p</b>  | Undetermined |
| H1  | 478183_mir | <b>hsa-miR-629-5p</b>  | Undetermined |
| H2  | 478189_mir | <b>hsa-miR-652-3p</b>  | 28.24447632  |
| H3  | 478192_mir | <b>hsa-miR-660-5p</b>  | 33.51945877  |

|     |            |                       |              |
|-----|------------|-----------------------|--------------|
| H4  | 478342_mir | <b>hsa-miR-766-3p</b> | Undetermined |
| H5  | 478207_mir | <b>hsa-miR-885-5p</b> | 33.82443237  |
| H6  | 477827_mir | <b>hsa-miR-92a-3p</b> | 26.82304192  |
| H7  | 477823_mir | <b>hsa-miR-92b-3p</b> | 27.94299126  |
| H8  | 478209_mir | <b>hsa-miR-93-3p</b>  | 35.20497131  |
| H9  | 478210_mir | <b>hsa-miR-93-5p</b>  | 30.32363701  |
| H10 | 478213_mir | <b>hsa-miR-95-3p</b>  | Undetermined |
| H11 | 478519_mir | <b>hsa-miR-99a-5p</b> | Undetermined |
| H12 | 478343_mir | <b>hsa-miR-99b-5p</b> | 35.08739853  |
